# Supplementary material for: Synthesis and Characterization of PU/PLCL/CMCS Electrospun Scaffolds for Skin Tissue Engineering
Source: MDPI journal article supplement (doi:10.3390/polym14225029), 2022-11-19
Supplement: s1 [file s1]

## **Supporting Information**

### **Synthesis and characterization of PU/PLCL/CMCS electrospun scaffolds for skin tissue engineering**

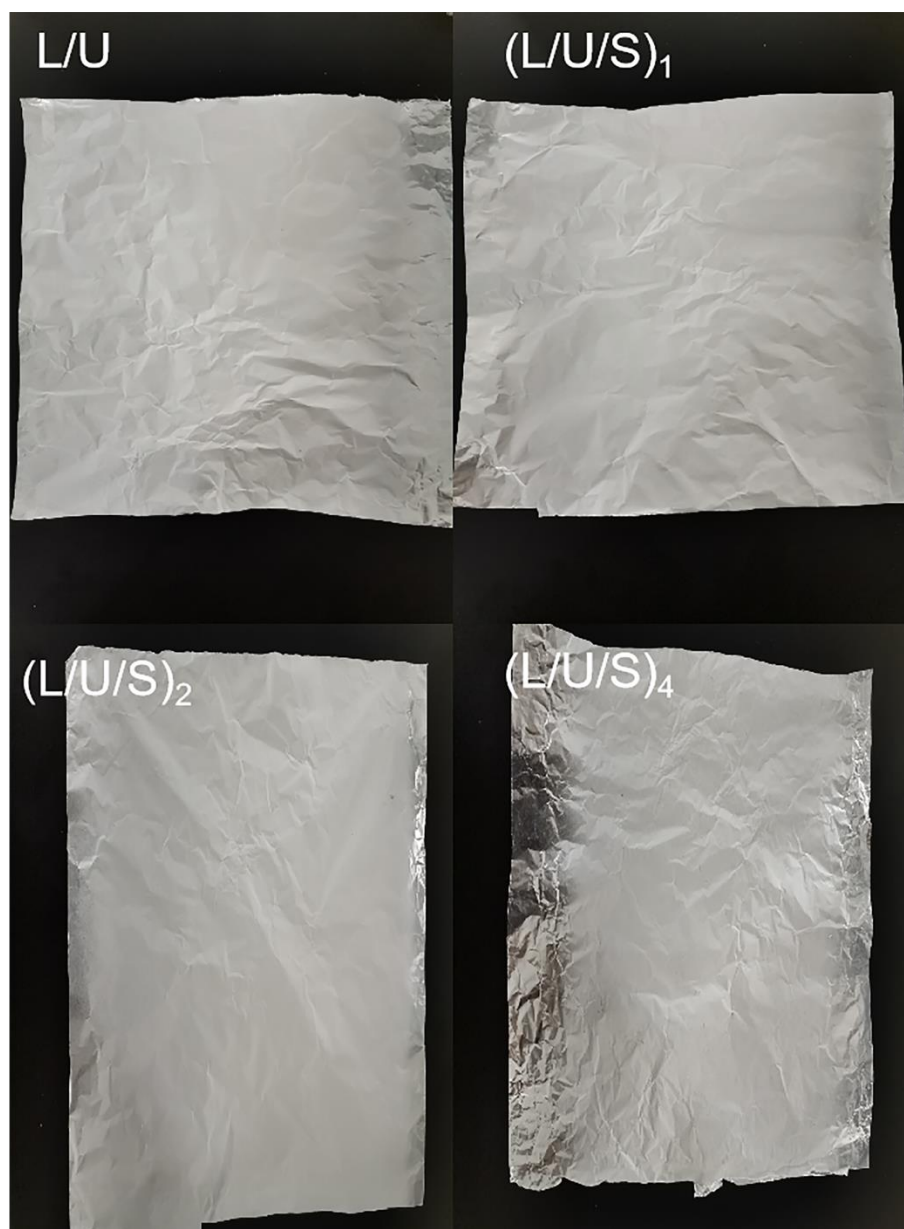

**Figure S1.** Visual images of the electrospun fiber membrane prepared with different CMCS content.

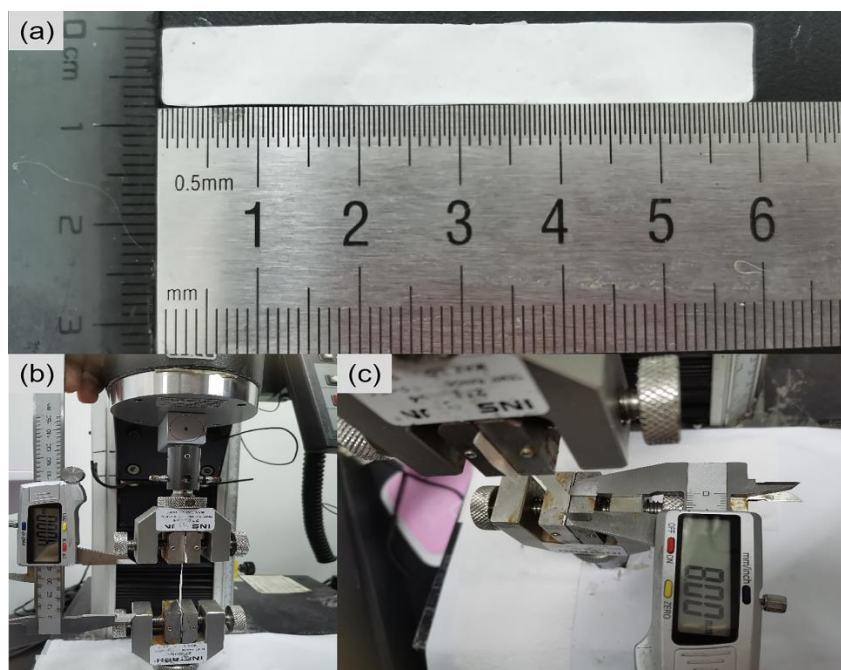

**Figure S2.** Original dimension of the electrospun membrane sample before stretching.

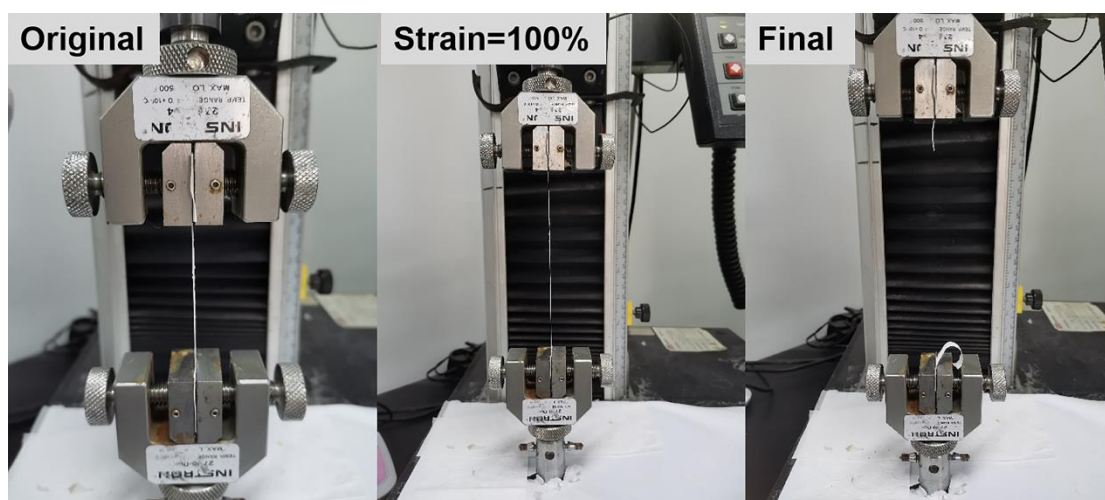

**Figure S3.** Images of the electrospun membrane sample in the stretching process.

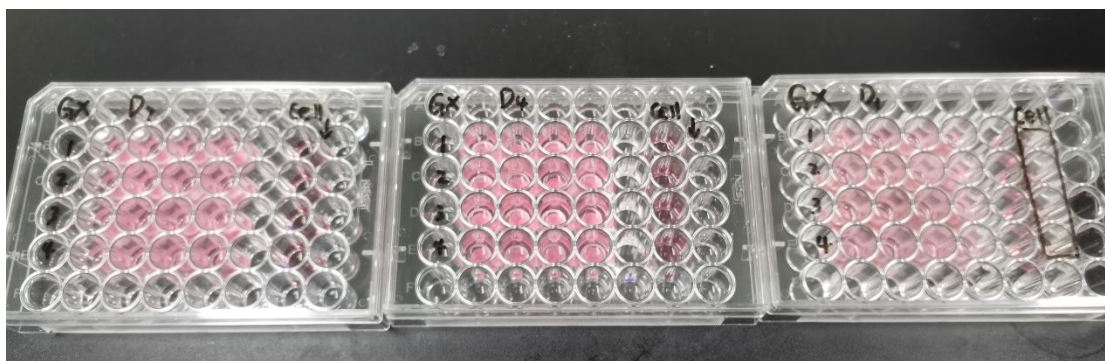

**Figure S4.** Image of cell culture plated in the methods CCK-8.
